# Supplementary material for: Neuronal sequences during theta rely on behavior-dependent spatial maps
Source: eLife journal article supplement (doi:10.7554/elife.70296), 2021-10-18
Supplement: supp [file elife-70296-supp-v1.zip]

Archive with 9 entries (9 files):
- elife_poa_e70296_Transparent_Reporting_File.docx
- elife_poa_e70296_Figure_1_figure_supplement_1.pdf
- elife_poa_e70296_Figure_4_figure_supplement_1.pdf
- elife_poa_e70296_Figure_6_figure_supplement_1.pdf
- elife_poa_e70296_Figure_6_figure_supplement_2.pdf
- elife_poa_e70296_Figure_6_figure_supplement_3.pdf
- elife_poa_e70296_Figure_7_figure_supplement_1.pdf
- elife_poa_e70296_Figure_7_figure_supplement_2.pdf
- elife_poa_e70296_Supplementary_file_1.ods
