# Supplementary material for: Neuronal sequences during theta rely on behavior-dependent spatial maps
Source: eLife journal article supplement (doi:10.7554/elife.70296), 2021-10-18
Supplement: supp [file elife-70296-supp-v1.zip › elife_poa_e70296_Supplementary_file_1.ods]

## Sheet: Summary of Statistical Tests
			Non-parametric tests				Parametric tests
test	animal	N	test type	p	Tau		test type	p
Fig 4B: Individual place fields’ sizes change with running speed	ec013	160	Wilcoxon signed-rank test	6.37E-01
	ec014	50		9.28E-01
	ec016	69		4.70E-01
	Achilles	70		3.08E-01
	Buddy	18		7.77E-01
	Cicero	22		6.56E-01
Fig 4C: Pooling across place fields, field sizes change with running speed	ec013	649	Kendall’s τ test	3.57E-09	0.16		Wald test*	2.85E-08
	ec014	209		4.99E-09	0.30			1.05E-05
	ec016	260		2.51E-01	0.05			8.92E-01
	Achilles	243		2.45E-14	0.36			1.04E-12
	Buddy	58		6.22E-06	0.45			1.10E-08
	Cicero	82		1.90E-02	0.20			2.22E-02
Fig 5B: Individual place field’s phase precession slopes change with running speed	ec013	139	Wilcoxon signed-rank test	1.39E-01
	ec014	35		6.42E-02
	ec016	62		8.97E-01
	Achilles	47		7.35E-01
	Buddy	14		2.68E-01
	Cicero	18		7.34E-01
Fig 5C: Pooling across place fields, phase precession slopes change with running speed	ec013	594	Kendall’s τ test	1.33E-05	0.13		Wald test*	1.29E-04
	ec014	188		2.00E-03	0.16			2.13E-06
	ec016	250		5.83E-03	0.13			1.61E-03
	Achilles	177		4.55E-15	0.42			1.25E-14
	Buddy	46		1.78E-09	0.65			5.73E-12
	Cicero	66		1.47E-01	0.13			1.45E-01
Fig 5E: Same as Fig 5B for individual passes through the fields	ec013	116	Wilcoxon signed-rank test	8.26E+01
	ec014	26		7.32E-01
	ec016	34		3.34E-01
	Achilles	<10		N/A
	Buddy	<10		N/A
	Cicero	<10		N/A
Fig 5F: Same as Fig 5C for individual passes through the fields	ec013	1273	Kendall’s τ test	5.28E-20	0.17		Wald test*	1.87E-14
	ec014	547		8.42E-04	0.09			2.47E-05
	ec016	565		4.73E-17	0.24			6.07E-22
	Achilles	58		2.63E-01	0.10			2.71E-02
	Buddy	73		3.29E-02	0.17			4.52E-02
	Cicero	27		3.88E-03	0.39			2.05E-02
Fig 6G & Fig 6 – Supplement 1: Theta trajectory lengths increase with characteristic running speed	ec013	3373	Kendall’s τ test	1.16E-69	0.20		Wald test*	9.68E-67
	ec014	4245		1.06E-171	0.29			2.58E-109
	ec016	3475		3.72E-109	0.25			5.52E-106
	Achilles	2410		3.04E-163	0.37			3.27E-135
	Buddy	463		8.83E-08	0.17			3.63E-17
	Cicero	1318		9.54E-13	0.13			9.64E-10
	ALL	15284		0.00E+00	0.27			0.00E+00
Fig 6H & Fig 6 – Supplement 2A: Place field sizes change with characteristic running speed	ec013	260	Kendall’s τ test	3.38E-10	0.27		Wald test*	7.20E-09
	ec014	72		7.46E-10	0.51			2.18E-09
	ec016	84		2.40E-03	0.24			5.19E-02
	Achilles	82		1.98E-12	0.54			1.14E-12
	Buddy	32		1.26E-07	0.68			2.32E-11
	Cicero	38		1.93E-04	0.43			1.05E-03
	ALL	568		1.65E-48	0.42			1.64E-38
Fig 6I & Fig 6 – Supplement 2B: Inverse phase precession slopes change with characteristic running speed	ec013	224	Kendall’s τ test	8.55E-09	-0.26		Wald test*	3.12E-09
	ec014	58		2.11E-06	-0.43			2.91E-09
	ec016	72		3.53E-04	-0.29			3.49E-03
	Achilles	53		1.55E-07	-0.50			1.44E-10
	Buddy	24		2.21E-05	-0.62			1.90E-03
	Cicero	23		3.84E-02	-0.31			2.75E-02
	ALL	454		6.64E-29	-0.35			1.30E-25
* Two-sided p-value for a hypothesis test whose null hypothesis is that the slope is zero, using Wald Test with t-distribution of the test statistic.
