# Supplementary figures and images for: Neuronal sequences during theta rely on behavior-dependent spatial maps
Source: eLife journal article supplement (doi:10.7554/elife.70296), 2021-10-18

**A**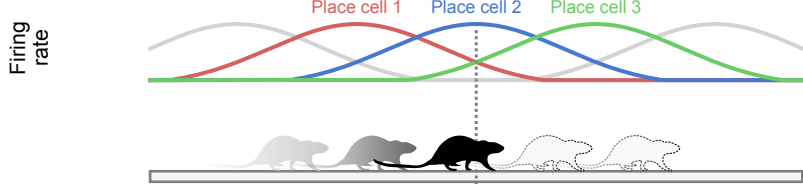**B**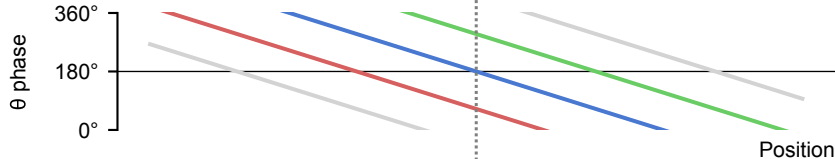**C**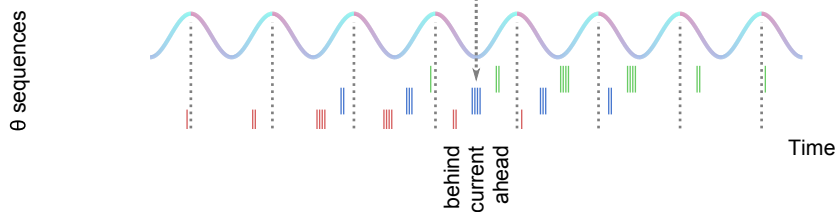

Supplement: supp [file elife-70296-supp-v1.zip › elife_poa_e70296_Figure_1_figure_supplement_1.pdf]

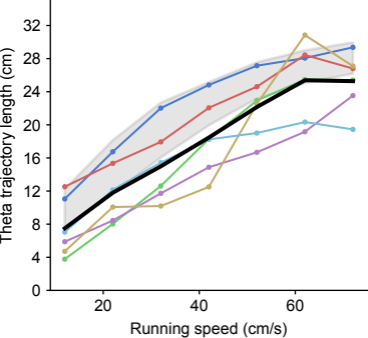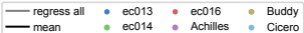

Supplement: supp [file elife-70296-supp-v1.zip › elife_poa_e70296_Figure_4_figure_supplement_1.pdf]

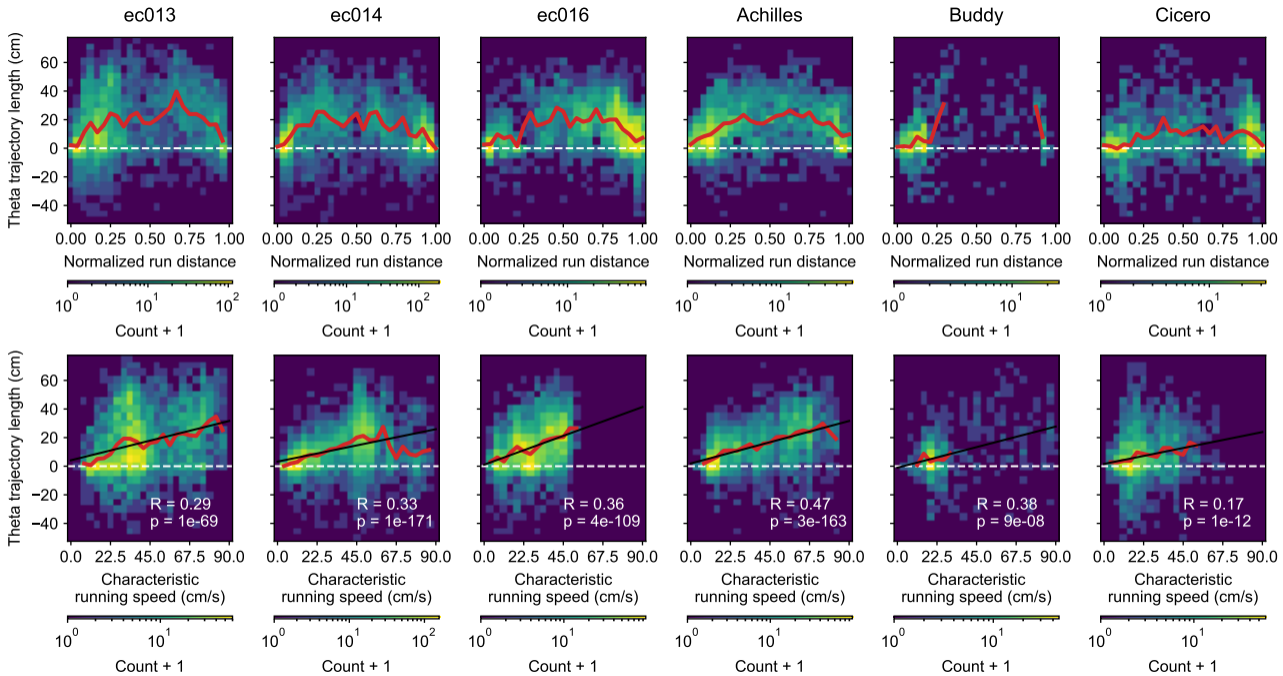

Supplement: supp [file elife-70296-supp-v1.zip › elife_poa_e70296_Figure_6_figure_supplement_1.pdf]

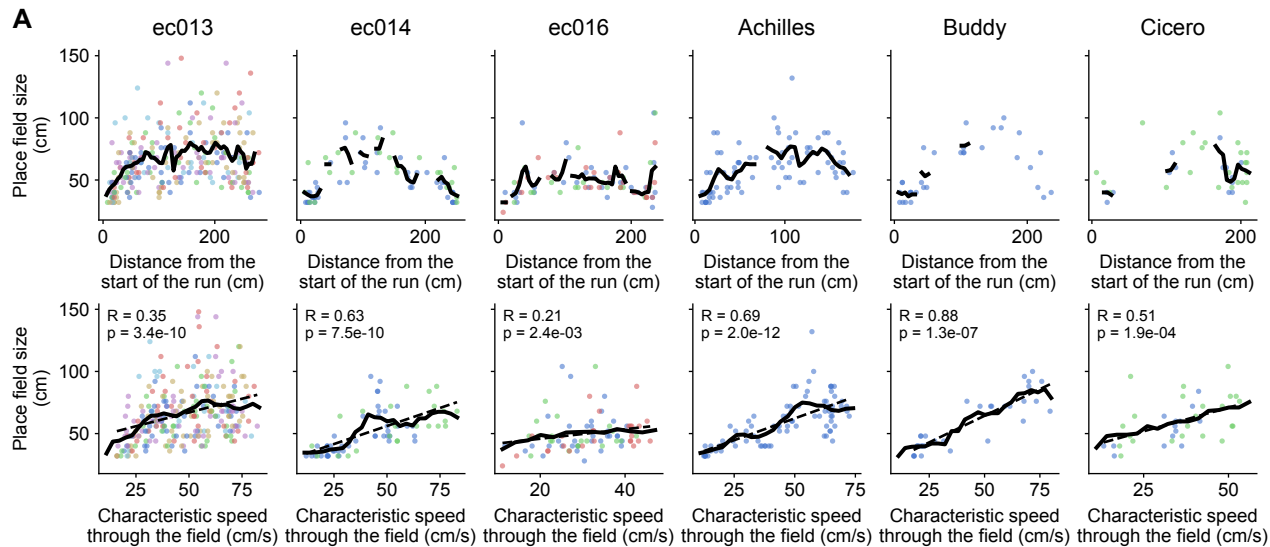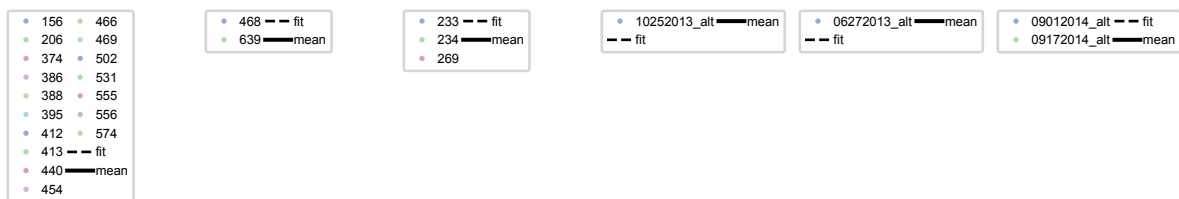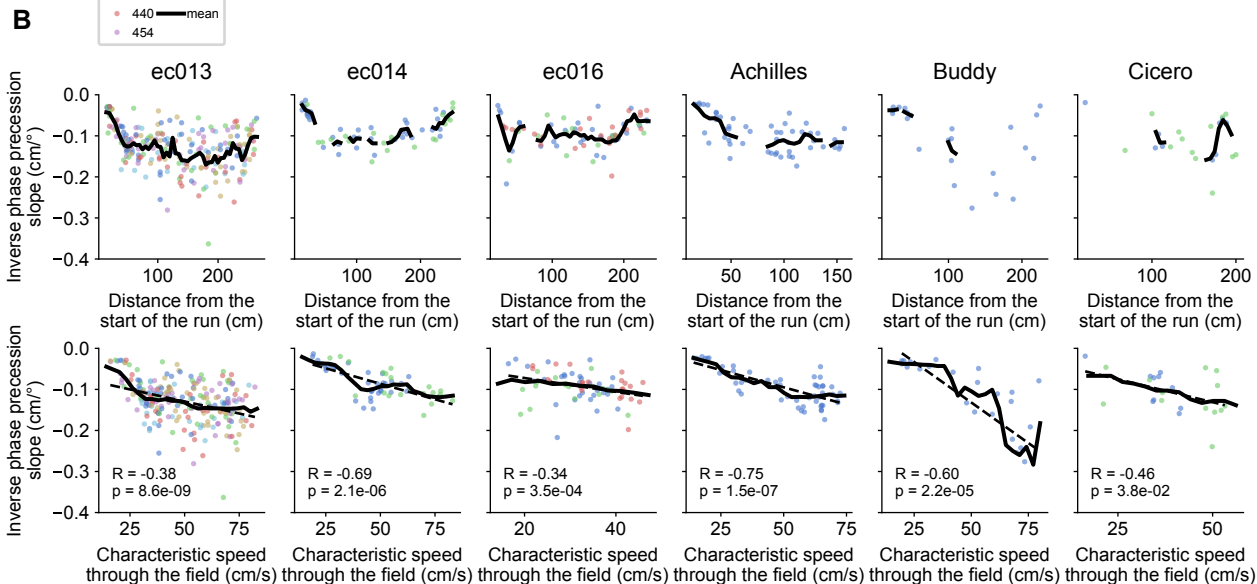

Supplement: supp [file elife-70296-supp-v1.zip › elife_poa_e70296_Figure_6_figure_supplement_2.pdf]

**A**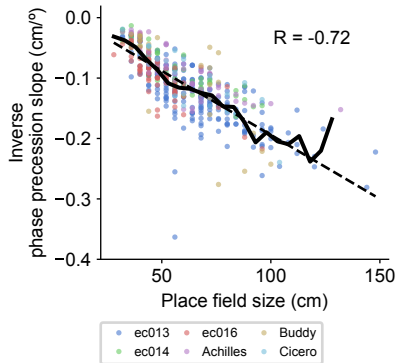**B**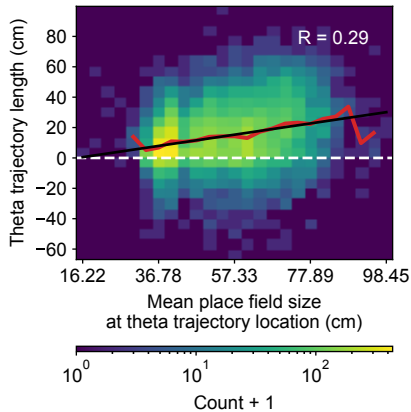**C**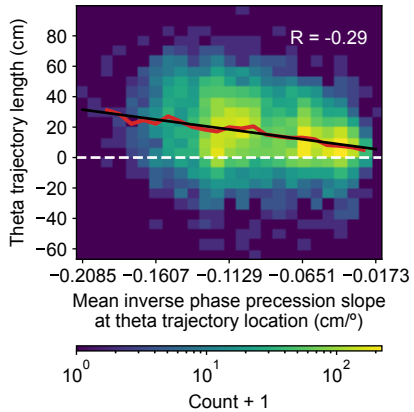

Supplement: supp [file elife-70296-supp-v1.zip › elife_poa_e70296_Figure_6_figure_supplement_3.pdf]

**Experimental**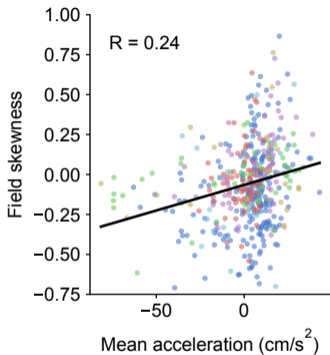**Behavior-dependent sweep model**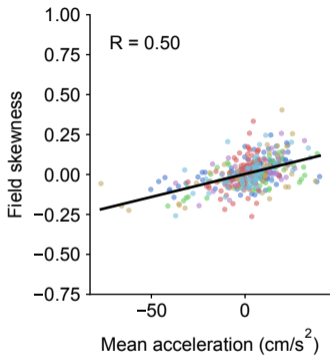

ec013 ec016 Buddy  
ec014 Achilles Cicero

Supplement: supp [file elife-70296-supp-v1.zip › elife_poa_e70296_Figure_7_figure_supplement_1.pdf]

## Experimental

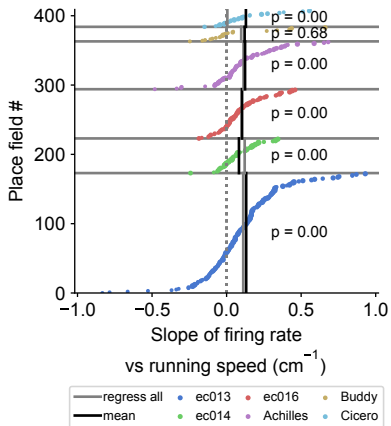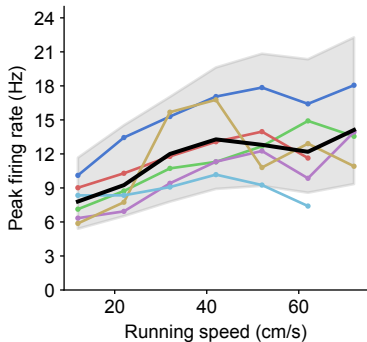

## Behavior-dependent sweep model

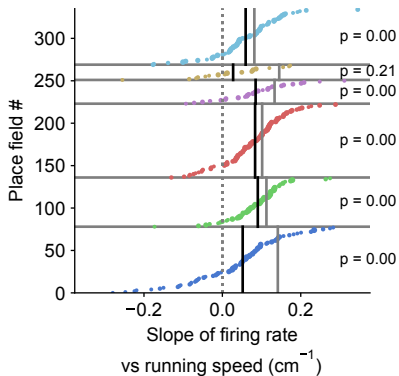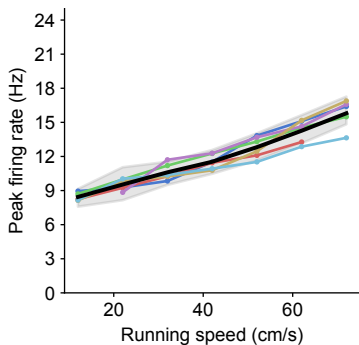

Supplement: supp [file elife-70296-supp-v1.zip › elife_poa_e70296_Figure_7_figure_supplement_2.pdf]
